# Supplementary figures and images for: Edoxaban Exposure‐Response Analysis and Clinical Utility Index Assessment in Patients With Symptomatic Deep‐Vein Thrombosis or Pulmonary Embolism
Source: PubMed Central journal article supplement — CPT Pharmacometrics Syst Pharmacol. 2016 Apr 15;5(4):222–32. doi: 10.1002/psp4.12077 (PMC4846783; doi:10.1002/psp4.12077), 2016-04-15

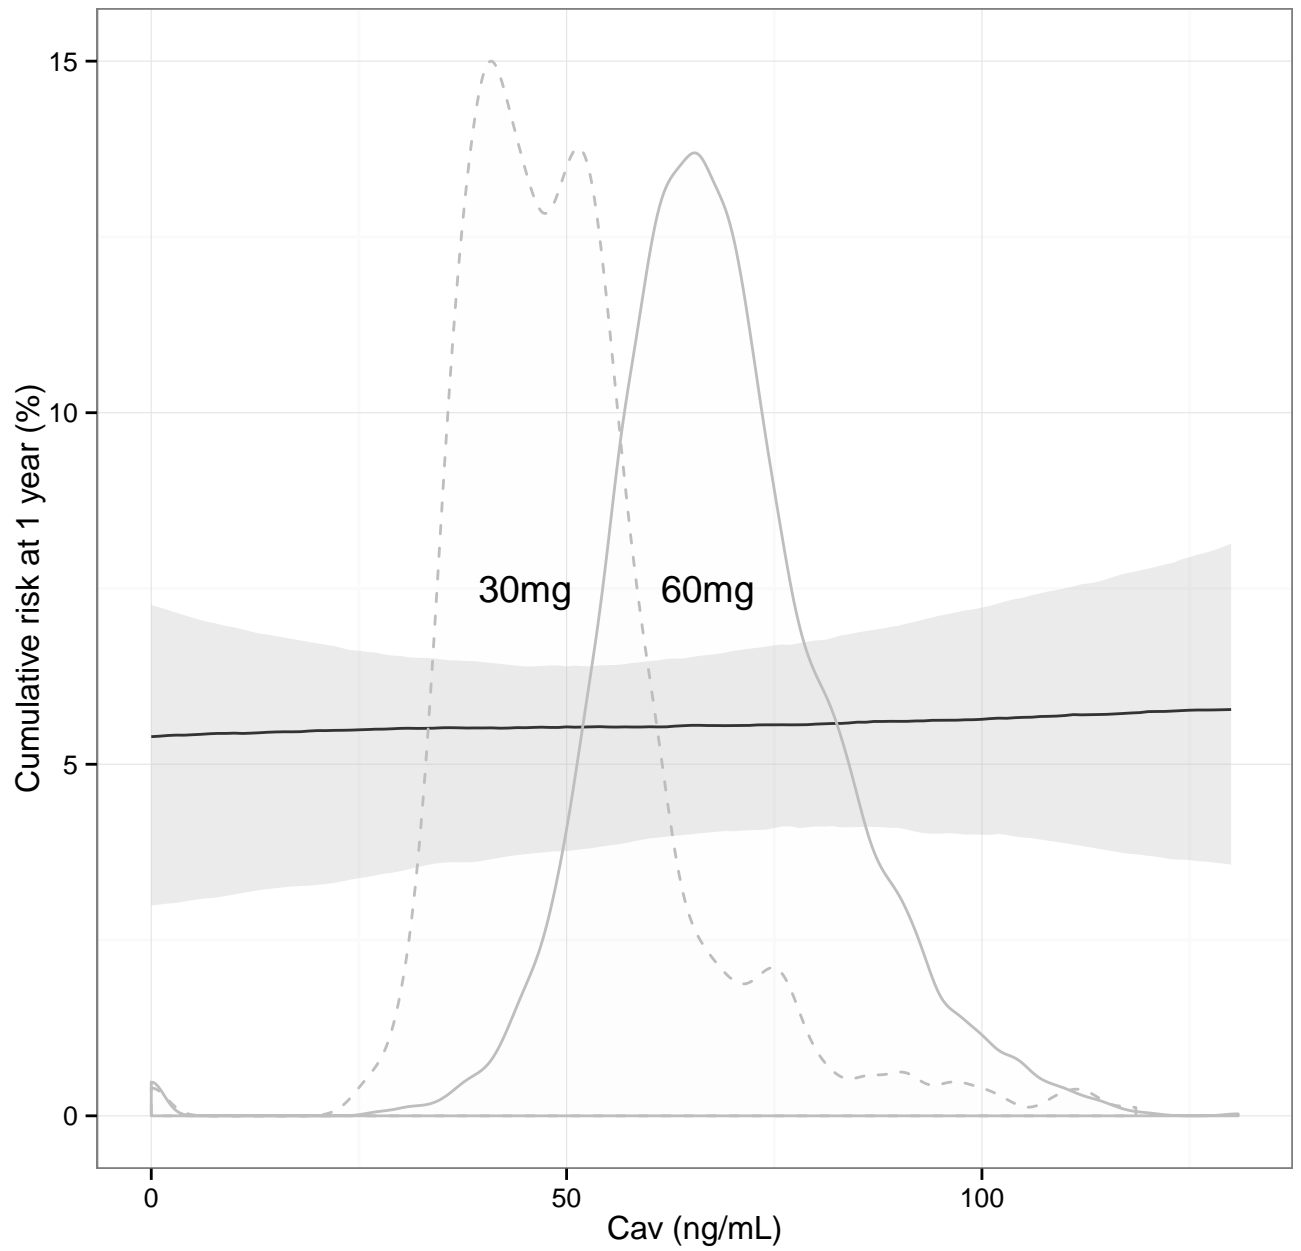

Supplement: PSP4-5-222-s001.pdf [file PSP4-5-222-s001.pdf]
